## Increased early sodium current provokes familial atrial fibrillation and reduces effectiveness of sodium channel block

O'Reilly M<sup>1\*</sup>, Sommerfeld LC<sup>1,2,3\*</sup>, O'Shea C<sup>1</sup>, Broadway-Stringer S<sup>1</sup>, Andaleeb S<sup>1</sup>, Reyat JS<sup>1</sup>, Kabir SN<sup>1</sup>, Malinova A<sup>1</sup>, Delbue D<sup>2,3</sup>, Fortmueller L<sup>2,3</sup>, Gehmlich K<sup>1,5</sup>, Pavlovic D<sup>1</sup>, Skryabin BV<sup>6</sup>, Holmes AP<sup>1,7</sup>, Kirchhof P<sup>1,3,4</sup>, Fabritz L<sup>1,2,3,4</sup>

<sup>1</sup>*Institute of Cardiovascular Sciences, University of Birmingham, UK*

<sup>2</sup>*University Center of Cardiovascular Science, University Heart and Vascular Center Hamburg, UKE Hamburg, Germany*

<sup>3</sup>*DZHK Standort Hamburg/Kiel/Luebeck, Germany*

<sup>4</sup>*Department of Cardiology, University Heart and Vascular Center UKE Hamburg, Germany*

<sup>5</sup>*Division of Cardiovascular Medicine, Radcliffe Department of Medicine and British Heart Foundation Centre of Research Excellence Oxford, University of Oxford, UK*

<sup>6</sup>*Medical Faculty, Core Facility Transgenic animal and genetic engineering Models (TRAM), University of Muenster, Germany*

<sup>7</sup>*Institute of Clinical Sciences, University of Birmingham, UK*

\*equal contribution

### **Corresponding author:**

Professor Larissa Fabritz

University Center of Cardiovascular Science

University Heart and Vascular Center, UKE Hamburg

Hamburg, Germany

E-Mail: [l.fabritz@uke.de](mailto:l.fabritz@uke.de)

# 1 **1 Abstract**

## 2 **1.1 Aims**

3 Atrial fibrillation (AF) is the most common cardiac arrhythmia. AF often develops due to concomitant  
4 cardiovascular conditions combined with a pre-existing atrial substrate. Familial, early onset forms of  
5 AF enable identification of this substrate. Pathogenic variants in genes encoding ion channels are  
6 associated with familial AF. The point mutation M1875T in the *SCN5A* gene, which encodes the  $\alpha$ -  
7 subunit of the cardiac sodium channel  $Na_v1.5$ , has been associated with increased atrial excitability  
8 and familial AF. Designing a new murine model carrying the *Scn5a* -M1875T mutation enabled us to  
9 study this atrial substrate in detail.

## 10 **1.2 Methods and Results**

11 Left atrial cardiomyocytes from newly generated *Scn5a*-M1875T<sup>+/-</sup> mice showed a selective increase  
12 in the early (peak) cardiac sodium current, measured by patch clamp. Microelectrode recordings of  
13 intact left atria revealed larger action potential amplitudes and a faster peak upstroke velocity.  
14 Conduction was studied using optical mapping. When challenged with the sodium channel blocker  
15 flecainide, *Scn5a*-M1875T<sup>+/-</sup> left atria showed less conduction slowing than matched wildtype atria. *In*  
16 *vivo* analysis using electrocardiograms and echocardiography, as well as cardiac histology, excluded  
17 overt hypertrophy or heart failure in young adult mice.

## 18 **1.3 Conclusion**

19 The *Scn5a*-M1875T point mutation causes a cardiac sodium channel gain-of-function and suggests  
20 increased atrial peak sodium current as a potential trigger for increased atrial excitability and atrial  
21 fibrillation.

## 22 1.4 Translational Perspective

23 The observed changes highlight a selective increase in peak sodium current as a cause of familial AF.

24 Our findings provide a possible explanation for the variable effectiveness of sodium channel blockers

25 in patients with AF. Carriers of such sodium channel gain-of-function mutations may benefit more

26 from tailored treatments.

27

## 28 Graphical abstract

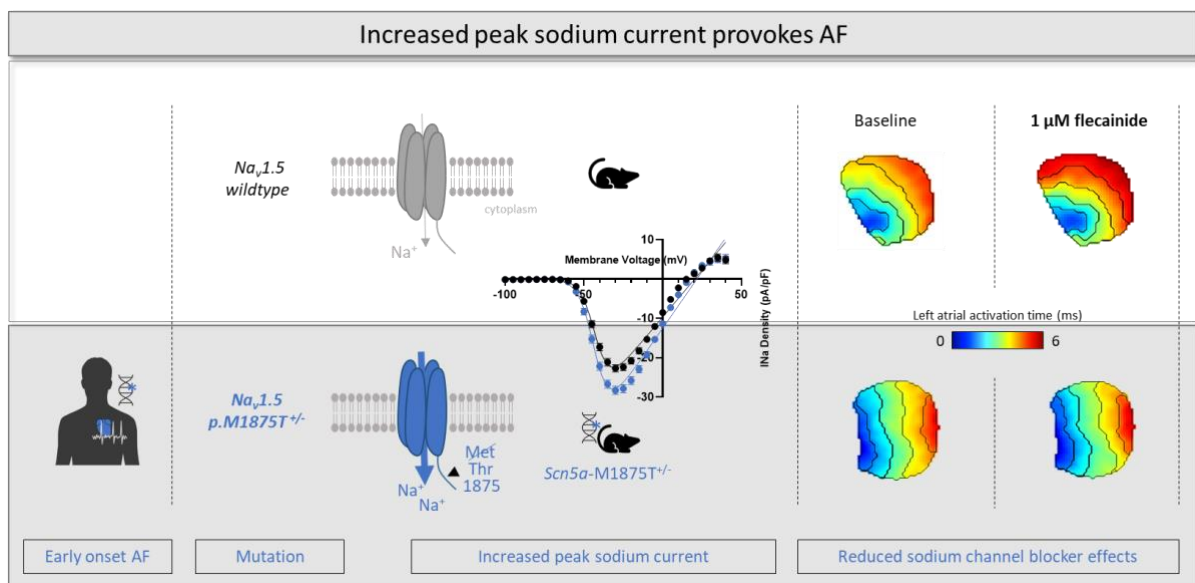

29

## 30 2 Introduction

31 Atrial fibrillation (AF), the most common cardiac arrhythmia, is characterised by episodes of irregular  
32 and uncoordinated atrial electrical activity. It is associated with ischaemic stroke, cardiovascular death  
33 and frequent hospitalisations <sup>1</sup>. A range of different common factors, such as heart failure, diabetes  
34 and increased formation of fibrosis, can damage the atria, contributing to AF <sup>2,3</sup>. These factors interact  
35 with a pre-existent, potentially inherited substrate to result in AF. Inherited forms are characterised  
36 by early onset of the condition. Pathogenic variants in several genes associated with cardiomyopathies  
37 have been identified in familial AF, including variants in sarcomeric and cell-cell contact genes, and  
38 others <sup>4-6</sup>. Within the group of ion channel genes, variants leading to dysfunction of the cardiac sodium  
39 channel are associated with familial AF <sup>4,7,8</sup>, both via variants in the genes coding for the channel or  
40 through upstream mechanisms altering the expression of sodium channel genes <sup>9,10</sup>.

41  
42 The cardiac voltage-gated sodium channel (Na<sub>v</sub>1.5) facilitates movement of sodium (Na<sup>+</sup>) ions across  
43 the cardiomyocyte membrane and hence elicits the cardiac Na<sup>+</sup> current (I<sub>Na</sub>). I<sub>Na</sub> is vital for electrical  
44 excitation preceding mechanical contraction of the myocardium, as transient influx of Na<sup>+</sup> triggers the  
45 fast upstroke phase of the cardiac action potential and thus depolarisation of the cardiomyocyte  
46 membrane. The Na<sub>v</sub>1.5 channel is composed of both α- and β- subunits. The pore-forming α-subunit  
47 is encoded by the *SCN5A* gene. Variants in *SCN5A* have been linked to cardiac conditions, including AF  
48 <sup>11-13</sup>, Brugada syndrome <sup>14</sup>, conduction disease <sup>15-17</sup> and dilated cardiomyopathy <sup>18,19</sup>. *SCN5A* genetic  
49 variants reported <sup>20</sup> show various underlying mechanisms mainly linked to channel dysfunction,  
50 defective channel trafficking or protein complex formation <sup>17,21,22</sup>.

51 A missense *SCN5A* point mutation, Met1875Thr (M1875T), located in the C-terminus of the channel  
52 protein, was linked to autosomal dominant familial AF that spanned three generations of a family <sup>23</sup>.  
53 Atrial ectopy was evident in mutation carriers in adolescence, and persistent AF occurred as early as  
54 27 years of age. Analyses in the human cell line HEK293 heterologous expression system <sup>23</sup> suggested  
55 an enhanced function of the mutated Na<sub>v</sub>1.5 channel.

56

57 To investigate the impact of the M1875T mutation in a more physiological setting, we generated and  
58 characterised a novel knock-in murine model (*Scn5a*-M1875T<sup>+/-</sup>). Mice that were heterozygous for the  
59 M1875T mutation were viable and studied herein. We investigated these mice from the whole organ  
60 *in vivo* to the level of the single cell *ex vivo*.

## 61 **3 Methods**

### 62 **3.1 Generation and sequencing of the *Scn5a*-M1875T murine model**

63 Mice heterozygous for the knock-in mutation M1875T in the *Scn5a* gene (*Scn5a*-M1875T<sup>+/-</sup>) were  
64 generated by T-C point-mutating exon 28 of the cardiac sodium channel *SCN5A* gene using  
65 pSCN5a\_targ3 targeting vector and CRISPR/Cas9 system in murine embryonic stem (ES) cells (Figure  
66 1a). Mutation-harboring ES cells were characterised using Southern blot analysis and sequenced in  
67 order to exclude genomic rearrangements (Figure 1b)<sup>24, 25</sup>, and injected into B6D2F1 mouse  
68 blastocysts. Sequencing analysis of the mutation-containing region using DNA from adult wildtype  
69 (WT) and heterozygous *Scn5a*-M1875T<sup>+/-</sup> mice on C57Bl/6J x 129sv hybrid genetic background are  
70 shown in Figure 1c. Detailed steps of the generation are further explained in the supplement.

71 Methionine at position 1875 of the human Na<sub>v</sub>1.5 protein sequence corresponds to position 1877 of  
72 the murine sequence. The latter is therefore point-mutated in this model. However, to underpin the  
73 bedside-to-bench nature of this investigation, we use the human annotation and refer to it as “*Scn5a*-  
74 M1875T” throughout this manuscript.

75 Mice were bred on an FVB or 129/sv genetic background and housed in individually ventilated cages  
76 with sex-matched littermates (2-5 mice/cage), under standard conditions: 12 hours light/dark circle,  
77 22°C and 55% humidity. Food and water were available *ad libitum*. The health status of mice used in  
78 the study was monitored daily and prior to experiments.

79 Functional experiments were conducted on hearts of male and female young adult mice (8-20 weeks),  
80 heterozygous for the knock-in mutation M1875T in the *Scn5a* gene (*Scn5a*-M1875T<sup>+/-</sup>) and their WT  
81 littermates.

### 82 **3.2 Study approval**

83 All procedures were performed in compliance with the guidelines from Directive 2010/63/EU of the  
84 European Parliament on the protection of animals used for scientific purposes and conducted in

85 accordance with rules and regulations for experiments with animals and approved by the UK Home  
86 Office (PPL number 30/2967) and by the institutional review board of University of Birmingham.

### 87 **3.3 Murine ECG recordings *in vivo***

88 Non-invasive electrocardiograms (ECG) were recorded in conscious young adult mice (8-19 weeks)  
89 using a tunnel system for gentle restraint (ecgTunnel, EMKA Technologies, Paris, France)<sup>26</sup>. ECG  
90 recordings were analysed using ECGauto software (EMKA Technologies, Paris, France). ECGs were also  
91 recorded in sedated mice during echocardiography as below.

### 92 **3.4 Murine echocardiography *in vivo***

93 Echocardiography was performed in sedated mice (2% isoflurane, supplemented with 100% O<sub>2</sub>) using  
94 Vevo<sup>®</sup> 2100 system (VisualSonics, Amsterdam, Netherlands) as reported previously<sup>27</sup>. Heart rate was  
95 maintained at 450 ± 70 bpm. Left atria (LA) were visualised in the parasternal long axis view in the  
96 plane of the aortic root. LA area and diameter were measured during pre-atrial contraction, using the  
97 P-wave of the limb ECG trace as a guide. Left ventricular parameters were also measured in the  
98 parasternal long axis view.

### 99 **3.5 Left atrial murine cardiomyocyte isolation**

100 Murine hearts were excised under deep terminal anaesthesia (4% isoflurane inhalation in O<sub>2</sub>,  
101 1.5 L/min) and perfused at 4 mL.min<sup>-1</sup> at 37°C on a vertical Langendorff apparatus with the following  
102 solutions, equilibrated with 100% O<sub>2</sub>: (i) HEPES-buffered, Ca<sup>2+</sup>-free, modified Tyrode's solution  
103 containing in mM: NaCl 145, KCl 5.4, MgSO<sub>4</sub> 0.83, Na<sub>2</sub>HPO<sub>4</sub> 0.33, HEPES 5, and glucose 11 (pH 7.4,  
104 NaOH) x 5 min; (ii) Tyrode's enzyme solution containing 640 µg/mL collagenase type II, 600 µg/ml  
105 collagenase type IV and 50 µg/ml protease (Worthington, Lakewood, NJ), 20 mM taurine and 3 µM  
106 CaCl<sub>2</sub> x 8-12 min. The heart was removed from the Langendorff setup and perfused with 5 mL of  
107 modified Kraft-Bruhe (KB) solution containing in mM: DL-potassium aspartate 10, L-potassium

108 glutamate 100, KCl 25, KH<sub>2</sub>PO<sub>4</sub> 10, MgSO<sub>4</sub> 2, taurine 20, creatine 5, EGTA 0.5, HEPES 5, 0.1% BSA, and  
109 glucose 20 (pH 7.2, KOH).

110 The LA was dissected free and cardiomyocytes were dissociated gently with fire-polished glass  
111 pipettes (2 to 1 mm diameter in sequence). Cells were re-suspended in 2 mL KB buffer and Ca<sup>2+</sup> was  
112 gradually reintroduced to the cell suspension incrementally over a period of 2 hours to reach a final  
113 concentration of 1 mM. All experiments were performed within 8 hours of isolation.

### 114 **3.6 Whole-cell patch clamp electrophysiology of isolated left atrial cardiomyocytes**

115 Dissociated murine LA cardiomyocytes were plated on, and allowed to adhere to, laminin-coated  
116 coverslips (10 mm diameter) for at least 20 minutes. Coverslips were transferred to a recording  
117 chamber and were continually superfused at 3 mL.min<sup>-1</sup>, with a low Na<sup>+</sup> external solution containing  
118 in mM; NaCl 10, KCl 4.5, C<sub>5</sub>H<sub>14</sub>CINO 130, CaCl<sub>2</sub> 1, MgCl<sub>2</sub> 1.2, HEPES 10 and glucose 10 (pH 7.4 with  
119 CsOH). To block L-type Ca<sup>2+</sup> currents, 2 mM NiCl<sub>2</sub> was added to the superfusate. Experiments were  
120 performed at 22 ± 0.5°C. Whole-cell patch clamp recordings were obtained in voltage-clamp mode  
121 using borosilicate glass pipettes (tip resistances 1.5-3 MΩ)<sup>28</sup>.

122 For Na<sup>+</sup> current recordings, the pipette solution contained in mM: CsCl 115, NaCl 5, EGTA 10, HEPES  
123 10, MgATP 5, TEACl 20 and MgCl<sub>2</sub> 0.5 (pH 7.2, KOH). Voltage-dependent Na<sup>+</sup> currents were evoked by  
124 5 mV step depolarisations (100 ms) from a holding potential of -100 mV to test potentials ranging from  
125 -95 mV to +40 mV. To investigate Na<sub>v</sub>1.5 voltage-dependent inactivation kinetics, cells were subject  
126 to 500 ms pre-pulses ranging from -120 mV to -40 mV, followed by a 100 ms step to -30 mV. For Na<sub>v</sub>1.5  
127 time-dependent recovery kinetics, a standard two pulse protocol was used (-120 mV to -30 mV,  
128 20 ms), with the time between the two pulses incrementally varying between 5 and 950 ms.

129 All recordings and analysis protocols were performed using an Axopatch 200B amplifier (Molecular  
130 Devices, USA) and digitized at 50 kHz using a CED micro1401 driven by Signal v6 software (Cambridge



131 Electronic Design, Cambridge, UK). Series resistance was compensated, ranging between 60-100% for  
132 all cells. Experiments were terminated if series resistance abruptly changed or was above 10 M $\Omega$ .

### 133 **3.7 Left atrial murine microelectrode recordings**

134 As previously described<sup>28-30</sup>, following isolation the LA was immediately transferred into a dissecting  
135 chamber and continuously superfused at 10 mL.min<sup>-1</sup> with a bicarbonate buffered Krebs-Henseleit  
136 (KH) solution containing in mM: NaCl 118; NaHCO<sub>3</sub> 24.88; KH<sub>2</sub>PO<sub>4</sub> 1.18; Glucose 11; MgSO<sub>4</sub> 0.83; CaCl<sub>2</sub>  
137 1.8; KCl 3.52, equilibrated with 95% O<sub>2</sub>/5% CO<sub>2</sub>, 36-37°C, pH 7.4. Micro-dissection and pinning out of  
138 the LA was performed using a dissection microscope (Stemi SV 11, Zeiss, Germany). The LA was paced  
139 at 1–10 Hz via bipolar platinum electrodes. Action potentials (APs) were recorded from freely  
140 contracting LA using custom made glass floating microelectrodes containing 3 M KCl, (resistance 15-  
141 30 M $\Omega$ ). Voltage signals were amplified and digitised at 20 kHz and were unfiltered (Axoclamp 2B;  
142 Molecular Devices, California, USA; Spike2 software Cambridge Electronic Design, Cambridge, UK).  
143 Measured parameters included the resting membrane potential (RMP), action potential amplitude  
144 (APA), peak depolarisation rate (dV/dt) and action potential duration (APD) at 30-90% repolarisation.  
145 APs were only analysed following sufficient rate adaptation achieved after at least 50 stimulated APs  
146 at each frequency.

### 147 **3.8 Optical mapping of murine left atria**

148 Optical mapping of the LA was conducted as previously described<sup>31, 32</sup>. Isolated whole hearts were  
149 loaded on to a vertical Langendorff apparatus and perfused with a standard KH solution. Hearts were  
150 perfused at 4 mL.min<sup>-1</sup> (equilibrated with 95%O<sub>2</sub>/5%CO<sub>2</sub> and heated to 36-37°C, pH 7.4). Hearts were  
151 loaded with 25  $\mu$ L of voltage sensitive dye Di-4-ANEPPS at a concentration of 5 mg/mL, diluted in 1 mL  
152 of KH solution and delivered via bolus port injection over 3-5 minutes. The LA was then isolated and  
153 pinned in a superfusion chamber containing 37°C KH solution for transfer to the optical mapping  
154 setup, anterior surface facing up.

155 In the optical mapping system, atria were superfused with KH solution (95%O<sub>2</sub>/5%CO<sub>2</sub>, 36-37°C)  
156 containing contraction uncoupler Blebbistatin (35 μM). For imaging, atria were illuminated by two  
157 dual LEDs at 530 nm. A 630 nm long-pass filter was used to sperate emitted fluorescence, imaged  
158 using an ORCA flash 4.0 CMOS camera (Hamamatsu, Japan). Images were acquired at a framerate  
159 0.987 kHz and pixel size of 71 μm/pixel<sup>2</sup>. Atria were paced using bipolar platinum electrodes delivering  
160 2 ms pulses at twice diastolic threshold (minimum voltage required to elicit APs).

161 One-minute baseline recording was taken following a 10 minutes equilibration period to ensure  
162 contraction uncoupling and temperature re-stabilisation. During imaging, atria were initially paced at  
163 330 ms pacing cycle length (PCL). A 'ramp' pacing protocol was then initiated, in which the atria were  
164 paced at 120 ms PCL for 100 stimuli and then PCL was reduced from 120 ms to 80 ms in 10 ms intervals  
165 every 20 stimuli. After taking baseline recordings, LED illumination was switched off and the  
166 superfusion solution replaced with an identical solution containing flecainide at a concentration of  
167 1 μM and then 5 μM (or control solution without flecainide for time control experiments). Subsequent  
168 recordings were then made as described above after 20 minutes superfusion with 1 μM flecainide  
169 solution, and then further 15 minutes with 5 μM flecainide solution. Atria were paced at 330 ms PCL  
170 continuously in dark conditions between recordings.

171 From these recordings, APD and conduction velocity (CV) were mapped across the LA using  
172 ElectroMap software <sup>32</sup>. Atria were removed from analysis at a given PCL if loss of 1:1 capture ratio  
173 with pacing stimuli (i.e. missed beats) was observed.

### 174 **3.9 Statistics**

175 For all murine experiments presented herein, experimenters were blinded to the genotype of the  
176 littermate pairs during data collection and analysis. Student t-tests were used for singular comparisons  
177 for normally distributed data. A hierarchical nested t-test (Figure 2) and Mann-Whitney test  
178 (Supplementary Table 3) were used where appropriate. Multiple comparisons were made using 2-way  
179 ANOVA with Bonferroni's post-hoc tests. For current-voltage graphs (Figure 2b), a Boltzmann curve

180 was fit to the data. All graphical representations display individual measurements. Means are quoted  
181 and shown in Figures  $\pm$  SEM. Level of statistical significance is shown in Figures as follows: \* $p < 0.05$ ;  
182 \*\* $p < 0.01$ ; \*\*\* $p < 0.001$ ; \*\*\*\* $p < 0.0001$ . Statistics and Figures were created using Prism 8 (GraphPad  
183 Software, San Diego, California).

## 184 **4 Results**

### 185 **4.1 Viable heterozygous *Scn5a*-M1875T<sup>+/-</sup> mice show normal cardiac size and basic function**

186 The point mutation previously identified in patients with early familial AF was successfully introduced  
187 to exon 28 of the mouse *Scn5a* gene via homologous recombination of a targeting vector. The vector  
188 contained the T-C point mutation (CRISPR/cas9-mediated) resulting in methionine-threonine  
189 exchange in the Na<sub>v</sub>1.5 protein (Figure 1). Offspring from both WT x heterozygote (= *Scn5a*-M1875T<sup>+/-</sup>)  
190 and heterozygote x heterozygote pairings were viable. No homozygous *Scn5a*-M1875T<sup>-/-</sup> offspring was  
191 born (Supplementary Figure 1b), suggesting embryonic lethality, as previously reported for other  
192 *Scn5a* mutations<sup>33, 34</sup>. Accordingly, the ratio of WT and heterozygous animals shifted from 1:2  
193 (expected) to approximately 1:3 when heterozygous animals were crossed (Supplementary Figure 1b).  
194 The ratio of male:female sex in offspring approximated 1:1 as expected (Supplementary Figure 1c).

195 Age-matched young adult WT and *Scn5a*-M1875T<sup>+/-</sup> mice displayed similar heart rate, PR-, QRS- and  
196 QT- interval regardless of genotype in electrocardiograms recorded awake (Supplementary Table 1)  
197 and during sedation (Supplementary Table 2). Echocardiography and histological examination  
198 excluded overt differences in atrial or ventricular structure (Supplementary Table 3, Supplementary  
199 Figure 2a). Accordingly, pro atrial natriuretic peptide (proANP) was detected in right atria as expected  
200 but was not elevated in ventricles (Supplementary Figure 2b).

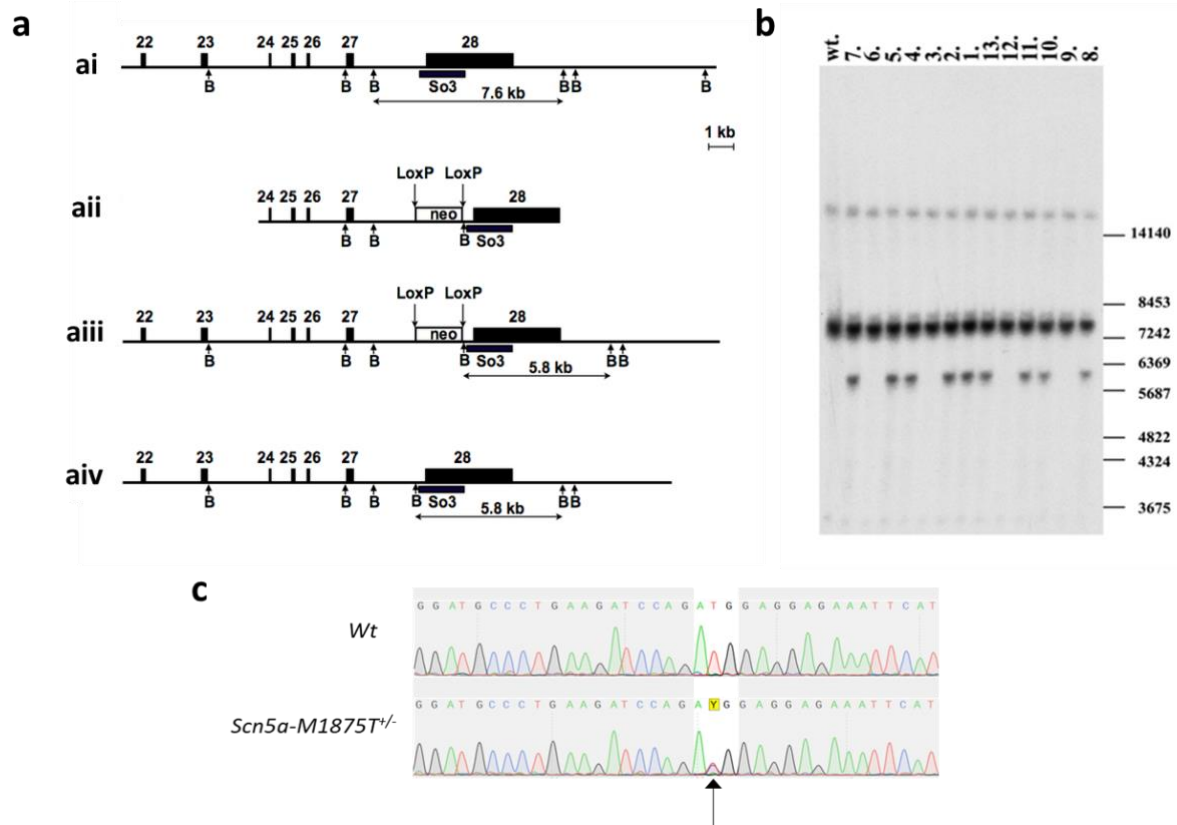

**Figure 1 Targeting of exon 28 of the mouse *Scn5a* gene in order to introduce the M1875T coding mutation, and sequencing confirmation of its presence**

**a)** The intronic and intergenic regions are shown as lines, exons are shown as filled boxes. The empty box corresponds to the neomycin resistance cassette (neo) flanked by the LoxP sites (vertical arrows). Exon numeration is shown above. The arrows below are corresponding to BamHI restriction endonuclease sites (B). The black box corresponds to Southern probe sequences (So3). The expected sizes of restriction DNA fragments are indicated below in kb. **ai)** Wildtype (WT) locus. **aii)** Targeted vector structure (without negative selection marker and plasmid backbone). **aiii)** Genomic locus after the homologous recombination. The neomycin cassette is present in intron 27 and flanked by two LoxP sites. **aiv)** Genomic locus after the CRE-mediated neo cassette deletion. **b)** Southern blot analysis of DNA isolated from mouse tail biopsy of the F1 offspring (1-13) and hybridized with the So3 probe. With help of the BamHI enzymatic digestion, we detect the WT allele 7.6 kb and targeted allele 5.8 kb. DNA samples 1, 2, 4, 5, 7, 8, 10, 11, and 13 contain correctly targeted *Scn5a* gene (*Scn5a*-M1875T<sup>+/-</sup>). Positions of the size marker (in bp) are shown on the right. The WT control animal is labeled “wt.”. **c)** Sequencing analysis of the *Scn5a* gene region containing the mutation site in back-crossed adult mice (on pure genetic background). The T-C mutation on one allele causing the methionine-threonine exchange at position 1875 (1877) is indicated by an arrow.

## 201 **4.2 Atrial *Scn5a*-M1875T<sup>+/-</sup> cardiomyocytes have an augmented peak sodium current density**

202 To determine the impact of the M1875T point mutation on peak  $I_{Na}$  amplitude and  $Na_v1.5$  channel  
 203 gating properties, left atrial cardiomyocytes from WT and *Scn5a*-M1875T<sup>+/-</sup> mice (8-13 weeks) were  
 204 isolated and whole-cell patch clamp recordings were performed.

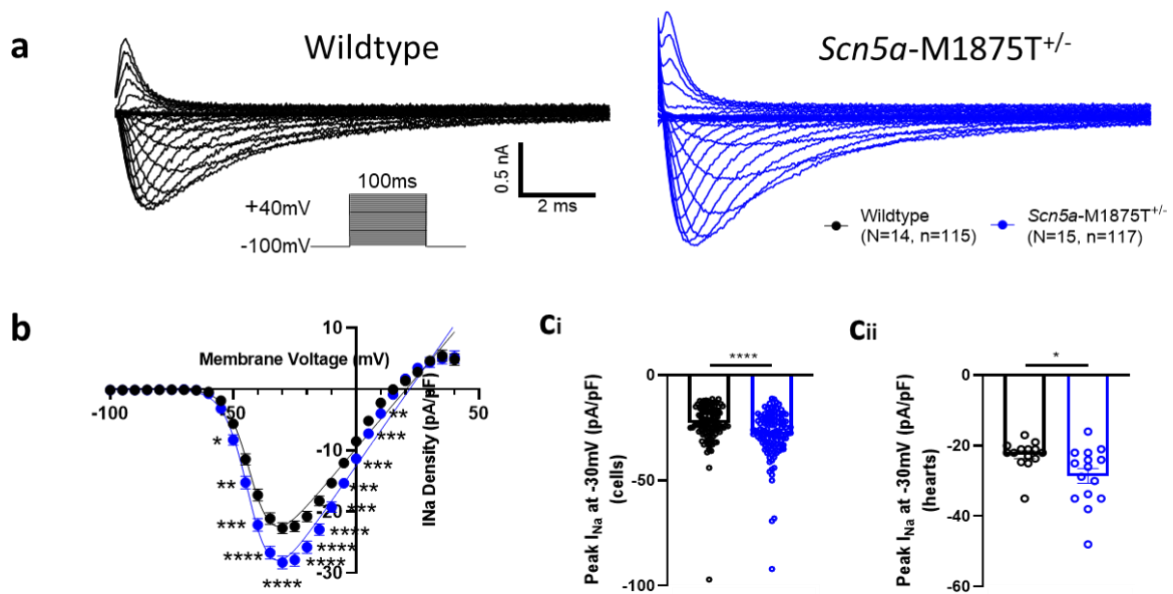

**Figure 2 Isolated left atrial cardiomyocytes with the *Scn5a*-M1875T<sup>+/-</sup> mutation have a larger sodium current than wildtypes when measured with whole-cell patch clamp electrophysiology**

**a)** Representative sodium current ( $I_{Na}$ ) traces from whole-cell voltage clamp recording of isolated left atrial (LA) cardiomyocytes from wildtype (WT) (black) and *Scn5a*-M1875T<sup>+/-</sup> (blue) mice. **b)** Normalised grouped data revealed that the *Scn5a*-M1875T<sup>+/-</sup> mutation increases peak  $I_{Na}$  in LA cardiomyocytes over test potentials ranging from -100 to +40 mV. **c)** At the peak  $I_{Na}$  test potential of -30 mV, *Scn5a*-M1875T<sup>+/-</sup> cardiomyocytes had a significantly larger  $I_{Na}$  than WTs, both when comparing individual cells (n=115 WT, n=117 *Scn5a*-M1875T<sup>+/-</sup>) (**ci**) and animals (N=14 WT, N=15 *Scn5a*-M1875T<sup>+/-</sup>) (**cii**).

205 The M1875T variant increased  $I_{Na}$  over test potentials ranging from -100 to +40 mV (Figure 2a and b).

206 At a peak test potential of -30 mV, mean left atrial cardiomyocyte  $I_{Na}$  density was higher in *Scn5a*-

207 M1875T<sup>+/-</sup> (-28.3 ± 1.1 pA/pF, n=117 cells) than in WT littermates (-22.7 ± 0.9 pA/pF, n=115 cells,

208 p<0.0001, Figure 2ci). The elevation in  $I_{Na}$  was also apparent when recordings were grouped by animal

209 (*Scn5a*-M1875T<sup>+/-</sup> -27.7 ± 2.1 pA/pF, N=15 vs WT -22.3 ± 1.2 pA/pF, N=14, p=0.039, Figure 2cii) and

210 after applying hierarchical analysis (*Scn5a*-M1875T<sup>+/-</sup> -28.3 ± 1.1 pA/pF, n=117 cells, N=15 mice vs WT

211 -22.7 ± 0.9 pA/pF, n=115 cells, N=14 mice, p=0.016).

212 Capacitance measurements were not different between genotypes, indicative of similar cell size

213 (Supplementary Figure 3a).

214 Whole-cell  $I_{Na}$  voltage-dependent inactivation and time-dependent recovery kinetics were not altered

215 in *Scn5a*-M1875T<sup>+/-</sup> cardiomyocytes compared to WT (Supplementary Figure 3b and c).  $Na_v1.5$

216 expression in hearts of *Scn5a*-M1875T<sup>+/-</sup> mice at mRNA and the protein level revealed no difference at  
217 either the whole cell or isolated membrane fraction level (Supplementary Figure 4).

218 **4.3 Intact *Scn5a*-M1875T<sup>+/-</sup> left atria have a larger action potential amplitude and faster peak**  
219 **upstroke velocity**

220 To further characterise the impact of the M1875T variant on cardiac electrophysiology, action  
221 potentials (APs) were measured in whole left atrial tissue isolated from WT and *Scn5a*-M1875T<sup>+/-</sup> mice  
222 (9-13 weeks) using sharp microelectrodes. Representative AP traces are shown in Figure 3 during  
223 stimulation at 100 ms (Figure 3c) and 1000 ms pacing cycle length (PCL) (Figure 3f).

224 Action potential amplitude was significantly larger in *Scn5a*-M1875T<sup>+/-</sup> murine left atria at all PCLs  
225 tested and this effect was more pronounced at shorter cycle lengths (N=8, n=24-25, Figure 3a). The  
226 variant resulted in a faster peak upstroke velocity (dV/dt), especially at the shorter cycle lengths  
227 (100 ms PCL: WT 128.0 ± 3.3, n=24; *Scn5a*-M1875T<sup>+/-</sup> 142.8 ± 4.0 mV/ms, n=25, p=0.0282, Figure 3b).

228 The resting membrane potential<sup>35</sup> was not different between genotypes (100 ms PCL: WT -72.4 ± 0.6;  
229 *Scn5a*-M1875T<sup>+/-</sup> -73.1 ± 0.6 mV). Atrial activation times were also similar (100 ms PCL: WT 4.9 ± 0.2;  
230 *Scn5a*-M1875T<sup>+/-</sup> 4.9 ± 0.2 ms) (Supplementary Table 4). Only at the long PCL of 1000 ms, the AP  
231 duration (APD) at 50 and 90% repolarisation was shorter in *Scn5a*-M1875T<sup>+/-</sup> left atria than in WT  
232 (Figure 3d and e), while the APD at 30 and 70% repolarisation was not significantly different  
233 (Supplementary Table 4). Similarly, optical mapping data showed no APD differences at PCLs tested.

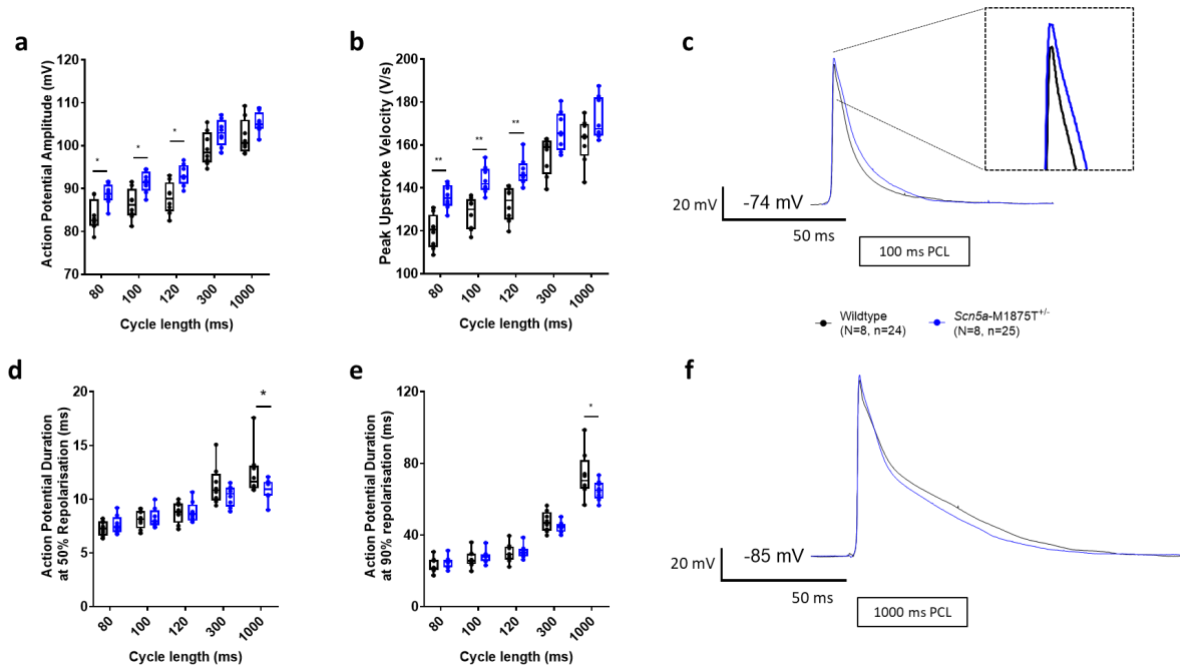

**Figure 3 Left atria with the *Scn5a*-M1875T<sup>+/-</sup> mutation have a larger action potential amplitude and a faster peak upstroke velocity when measured with the sharp microelectrode technique**  
**a)** *Scn5a*-M1875T<sup>+/-</sup> left atria (LA) had a significantly larger action potential (AP) amplitude at shorter pacing cycle lengths (PCLs) of 80-120 ms ( $p<0.05$ ) and **b)** a significantly faster peak upstroke velocity (dV/dt). **d-f)** When paced at 1000 ms PCL, *Scn5a*-M1875T<sup>+/-</sup> LA had a significantly shorter AP duration (APD) when measured at 50% (APD<sub>50</sub>) (**d**) and 90% (APD<sub>90</sub>) (**e**) repolarisation. \* $p<0.05$ , \*\* $p<0.01$ , wildtype (WT) vs *Scn5a*-M1875T<sup>+/-</sup>, N=8 per group, n=24 WT, n=25 *Scn5a*-M1875T<sup>+/-</sup>; ANOVA statistics. Also shown are representative AP traces from wildtype (black) and *Scn5a*-M1875T<sup>+/-</sup> (blue) LA when stimulated at 100 ms (**c**) and 1000 ms PCL (**f**).

234 **4.4 Flecainide-induced atrial conduction slowing and post-repolarisation refractoriness is less**

235 **pronounced in *Scn5a*-M1875T<sup>+/-</sup> left atria**

236 Optical mapping of WT and *Scn5a*-M1875T<sup>+/-</sup> whole left atrial tissue was performed to test effects of  
 237 the heterozygous *Scn5a*-M1875T mutation on atrial conduction.

238 Left atria were superfused with the open channel sodium channel blocker flecainide (1  $\mu$ M, clinically  
 239 used concentration) to determine the response of *Scn5a*-M1875T<sup>+/-</sup> and WT left atria. While  
 240 conduction velocity was unchanged at baseline, flecainide slowed conduction less in *Scn5a*-M1875T<sup>+/-</sup>



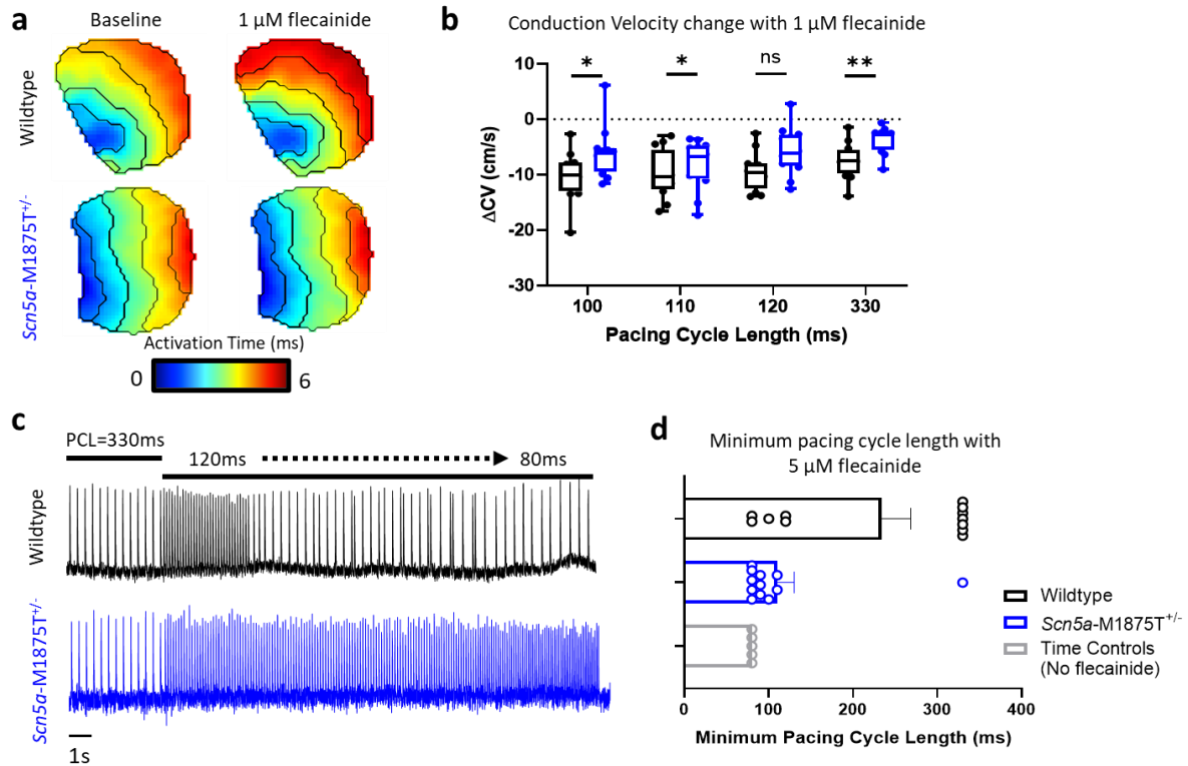

**Figure 4 Left atria with the *Scn5a-M1875T<sup>+/-</sup>* mutation have a reduced response to the anti-arrhythmic agent flecainide in optical mapping**

**a)** Example left atrial (LA) activation maps from wildtype (WT, top panels) and *Scn5a-M1875T<sup>+/-</sup>* (bottom panels) mice. Left panels show activation maps at baseline, right panels show activation of the same atria following exposure to 1  $\mu$ M flecainide for 20 minutes. **b)** Grouped data showing change in conduction velocity ( $\Delta$ CV) following exposure to 1  $\mu$ M flecainide in WT (black) and *Scn5a-M1875T<sup>+/-</sup>* (blue) LA for 20 mins. **c)** Example traces of optical action potentials (APs) recorded following further treatment of WT (top, black) and *Scn5a-M1875T<sup>+/-</sup>* (bottom, blue) LA with 5  $\mu$ M flecainide for 15 mins. **d)** Grouped data showing minimum pacing cycle length (PCL) at which 1:1 stimulus capture was maintained in WT (black) and *Scn5a-M1875T<sup>+/-</sup>* (blue) LA following exposure to 5  $\mu$ M flecainide. Time control data (grey) shows minimum PCL at which 1:1 stimulus capture was maintained in atria that were not exposed to flecainide but had been under experiment conditions for the same time period (35 mins from baseline recording). N=12 per group at 330 ms-100 ms PCL. Atria were excluded from further analysis at shorter PCLs if 1:1 capture was lost, only data in steady state was used. N=5 for time control experiments. \* $p$ <0.05, \*\* $p$ <0.01, WT vs *Scn5a-M1875T<sup>+/-</sup>*; ANOVA statistics.

241 left atria (conduction velocity difference at 100 ms PCL  $-6 \pm 1$  cm/s,  $n=12$ ,  $p=0.0357$ ) than in WT  
 242 (conduction velocity difference at 100 ms PCL  $-10 \pm 1$  cm/s,  $n=12$ ,  $p=0.0357$ , Figure 4a and b). We also  
 243 investigated flecainide-induced changes in left atrial refractoriness as it is known that flecainide  
 244 induces post-repolarisation refractoriness using rapid atrial pacing. Representative optical AP  
 245 recordings show 1:1 capture in the *Scn5a-M1875T<sup>+/-</sup>* left atria with flecainide, while several stimuli in  
 246 the WT left atria did not elicit APs (Figure 4c). All time-controlled left atria (no flecainide, same

247 experimental duration) were successfully paced with 1:1 capture down to 80 ms PCL. Loss of 1:1  
248 capture began at longer PCLs in WT (7/12 atria lost 1:1 capture at PCLs  $\leq$  120 ms) compared to *Scn5a*-  
249 M1875T<sup>+/-</sup> (1/12 atria lost 1:1 capture at PCLs  $\leq$  120 ms,  $p=0.0185$ ) left atria. The diastolic pacing  
250 threshold remained consistent throughout experiments. Thus, flecainide induced less pronounced  
251 post-repolarisation refractoriness in the *Scn5a*-M1875T<sup>+/-</sup> left atria.

## 252 **5 Discussion**

### 253 **5.1 Main findings**

254 Our study describes the effects of the familial atrial fibrillation (AF) mutation *Scn5a*-M1875T<sup>+/-</sup> in a  
255 newly generated murine model. Key effects are that the M1875T *Scn5a* mutation leads to an increased  
256 action potential upstroke velocity and amplitude and a selective increase in the early cardiac sodium  
257 current ( $I_{Na}$ ) while cardiomyocyte capacitance, and cardiac size and function are preserved. *Scn5a*-  
258 M1875T<sup>+/-</sup> left atria exhibit a dampened effect to the sodium channel blocker flecainide. Our data in  
259 this new murine model suggest that a selective increase of  $I_{Na}$  can cause familial AF, and that  
260 commonly used concentrations of sodium channel blockers may be less effective in familial forms of  
261 AF with a selective increase in  $I_{Na}$  than in other types.

### 262 **5.2 Novel gain-of-function properties of M1875T sodium channels in the murine left atrium**

263 Our data confirm a gain-of-function variant, namely an increased early sodium current as evidenced  
264 by an augmented action potential amplitude and larger  $I_{Na}$  in the *Scn5a*-M1875T<sup>+/-</sup> variant.

265  
266 In contrast to findings in HEK293 cells<sup>23</sup>, there was no leftward shift of channel activation in murine  
267 left atrial cardiomyocytes. Instead, we show a similarly augmented  $I_{Na}$  without alterations in channel  
268 gating properties. Generation of the murine mutant model allowed us to study mutated sodium  
269 channels in cardiac tissue within the presence of the greater protein complex including  $\alpha$ - and  $\beta$ -  
270 subunits and other membrane proteins, a complete cardiomyocyte contractile apparatus and all other  
271 cardiac cell types. In contrast, HEK293 cells would not contract, exclusively contained the mutated  
272 version of  $Na_v1.5$  in their membranes and are by necessity studied in isolation. Others have reported  
273 similar differences between HEK293 and cardiac model systems to the differences reported here<sup>36</sup>.  
274 Cardiac sodium channels have been observed to form dimers and structural analysis following the  
275 hypothesis of  $Na_v1.5$  dimerization via C-terminal interaction reveals that the surface of residue

276 Met1875 of one Na<sub>v</sub>1.5 cytosolic C-terminus will interact with Ala1924 of a second Na<sub>v</sub>1.5<sup>37</sup>. This  
277 prediction highlights the importance of the location site investigated in our model as it could provide  
278 a structural basis for altered Na<sub>v</sub>1.5-Na<sub>v</sub>1.5 channel interaction further to be investigated.

### 279 **5.3 Genotype-phenotype relationship of the *Scn5a*-M1875T<sup>+/-</sup> mutation**

280 Propagation of action potentials (APs) is carefully orchestrated throughout the atria to ensure  
281 effective cardiac function. Disturbed, inhomogeneous electrical activation or altered repolarisation  
282 can increase the propensity for re-entrant electrical circuits leading to atrial arrhythmias<sup>38,39</sup>. Defects  
283 in conduction velocity, resulting in slow or inhomogeneous conduction, occur due to altered  
284 depolarisation and repolarisation kinetics. While structural alterations of the atria, summarised as  
285 atrial cardiomyopathy, often contribute to atrial conduction disturbances<sup>40</sup>, defects in the cardiac  
286 sodium channel can also cause conduction defects leading to AF<sup>17-22</sup>.

287 Unlike other *SCN5A* mutations<sup>17-22</sup>, this variant shows a dampened response to flecainide both on  
288 conduction and post-repolarisation refractoriness<sup>41</sup>. Flecainide is a clinically used sodium channel  
289 blocker that inhibits cardiac I<sub>Na</sub> via blocking the pores of open Na<sub>v</sub>1.5 channels<sup>42,43</sup>. The effects of  
290 flecainide were reduced in *Scn5a*-M1875T<sup>+/-</sup> atria when compared to wildtype. This differential  
291 response to flecainide is likely due to the increased early sodium influx through the mutated Na<sub>v</sub>1.5  
292 channels, enabling preservation of conduction and activation properties in atrial cardiomyocytes  
293 when sodium channels are inhibited, leading to an enhanced activation reserve.

294 Murine models have limitations due to differences between mice and men, but they have been useful  
295 in characterising sodium channel mutations <sup>27, 33, 34, 44</sup>. Identified mutation-induced changes at the  
296 cellular and organ level in this model appear sufficient to explain AF in the original family.

297

298 It is unlikely that the M1875T mutation increases the late sodium current ( $I_{Na,l}$ ), as APs we measured  
299 were not prolonged by the mutation, in line with the initial report of the mutation in HEK cells <sup>23</sup>. A  
300 lack of AP prolongation clearly differs to findings in the  $\Delta KPQ-Scn5a$  mutant murine model showing a  
301 selective increase in  $I_{Na,l}$  <sup>27, 28, 33</sup>. The gain-of-function mutation  $\Delta KPQ-SCN5A$  resulted in prolonged  
302 atrial and ventricular AP duration, especially at longer pacing cycle lengths. This suggests that the  
303 M1875T mutation acts differently to, and is distinct from,  $SCN5A$  gain-of-function mutations leading  
304 to prolonged repolarisation and long QT syndrome, in concordance with the broad spectrum of  
305 phenotypic outcomes resulting from mutations in the same ion channel gene <sup>45</sup>.

306

307 An enhanced sodium influx into cardiomyocytes will alter the sodium-calcium homeostasis <sup>46, 47</sup>,  
308 modifying intracellular sodium and calcium concentrations and signalling in cardiomyocyte  
309 microdomains <sup>48, 49</sup>. This study found normal heart size and cardiomyocyte size. Nonetheless, chronic  
310 sodium overload can result in structural changes in the heart with ageing. In the future, the M1875T  
311 mouse model may be used to study the long-term effects of a selective increase in the early  $I_{Na}$ .  
312 Studies in human cardiomyocytes <sup>47</sup> and in atrial engineered heart tissue <sup>50, 51</sup>, would be desirable to  
313 assess the effect of the M1875T mutation in human models in the future.

## 314 **Conclusion**

315 The *Scn5a*-M1875T<sup>+/-</sup> variant causes a selective increase in the early cardiac sodium current,  
316 potentially leading to an increased activation reserve, whilst structure and contractile function are  
317 preserved. These findings can explain the familial occurrence of atrial ectopy and atrial fibrillation in  
318 the absence of reported severe heart disease and provide a novel mechanism by which altered  
319 cardiomyocyte sodium currents can predispose to atrial fibrillation. Our data also suggest that the  
320 M1875T gain-of-function mutation decreases the effectiveness of sodium channel blockers such as  
321 flecainide, which may have implications for patient treatment.

## 322 **Data availability**

323 The data underlying this article will be shared on reasonable request to the corresponding author.  
324 The software code on which part of the conclusions of this paper rely is available at  
325 <https://github.com/CXO531/ElectroMap> (O'Shea C, Yu TY; December 21<sup>st</sup> 2018; ElectroMap; GitHub).

## 326 **Funding**

327 This work was partially supported by the Leducq Foundation, British Heart Foundation  
328 [FS/12/40/29712; FS/13/43/30324; PG/17/30/32961; PG/20/22/35093; AA/18/2/34218], EU Horizon  
329 2020 CATCH ME (grant agreement number 633196), AFFECT-EU [grant agreement number 847770]  
330 and MAESTRIA [grant agreement number 965286], European Union BigData@Heart [grant agreement  
331 EU IMI 116074], German Centre for Cardiovascular Research supported by the German Ministry of  
332 Education and Research (DZHK), Medical Research Council [MR/V009540/1], and the Wellcome Trust  
333 [201543/B/16/Z; 221650/Z/20/Z].

## 334 **Author Contribution Statement**

335 LF and PK designed the research; BVS generated the mouse model in TRAM upon request by PK and

336 LF;

337 MO, LCS, CO, SBS, SA, JSR, SNK, AM, DD, LFo, LF and APH conducted experiments, analysed data and

338 performed statistical analysis;

339 KG, DP, APH, PK, LF supervised experiments and analysis.

340 MO, LCS, CO, SBS and LF wrote the manuscript together with all co-authors. All co-authors critically

341 reviewed the manuscript.

## 342 **Acknowledgments**

343 We thank Hartwig Wieboldt, Daniel Stastny, Clara Apicella and Olivia Grech for technical assistance.

## 344 **Conflict of Interest**

345 The authors have declared no direct conflict of interest in regards to the manuscript.

346 L.F. has received institutional research grants from governmental and charity funding agencies and

347 several biomedical companies.

348 P.K. has received research support from several drug and device companies active in atrial fibrillation

349 and has received honoraria from several such companies in the past.

350 L.F. and P.K. are listed as inventors on two patents held by University of Birmingham (Atrial Fibrillation

351 Therapy WO 015140571, Markers for Atrial Fibrillation WO 2016012783).

## 352 References

- 353 1. Fabritz L, Crijns H, Guasch E, Goette A, Hausler KG, Kotecha D, Lewalter T, Meyer C,  
354 Potpara TS, Rienstra M, Schnabel RB, Willems S, Breithardt G, Camm AJ, Chan A, Chua  
355 W, de Melis M, Dimopoulou C, Dobrev D, Easter C, Eckardt L, Haase D, Hatem S, Healey  
356 JS, Heijman J, Hohnloser SH, Huebner T, Ilyas BS, Isaacs A, Kutschka I, Leclercq C, Lip  
357 GYH, Marinelli EA, Merino JL, Mont L, Nabauer M, Oldgren J, Purerfellner H, Ravens U,  
358 Savelieva I, Sinner MF, Sitch A, Smolnik R, Steffel J, Stein K, Stoll M, Svennberg E,  
359 Thomas D, Van Gelder IC, Vardar B, Wakili R, Wieloch M, Zeemering S, Ziegler PD,  
360 Heidbuchel H, Hindricks G, Schotten U, Kirchhof P. Dynamic risk assessment to  
361 improve quality of care in patients with atrial fibrillation: the 7th AFNET/EHRA  
362 Consensus Conference. *Europace* 2021;**23**:329-344.
- 363 2. Fabritz L, Guasch E, Antoniades C, Bardinnet I, Benninger G, Betts TR, Brand E,  
364 Breithardt G, Bucklar-Suchankova G, Camm AJ, Carlidge D, Casadei B, Chua WW,  
365 Crijns HJ, Deeks J, Hatem S, Hidden-Lucet F, Kaab S, Maniadakis N, Martin S, Mont L,  
366 Reinecke H, Sinner MF, Schotten U, Southwood T, Stoll M, Vardas P, Wakili R, West A,  
367 Ziegler A, Kirchhof P. Expert consensus document: Defining the major health modifiers  
368 causing atrial fibrillation: a roadmap to underpin personalized prevention and  
369 treatment. *Nat Rev Cardiol* 2016;**13**:230-237.
- 370 3. Benjamin EJ, Al-Khatib SM, Desvigne-Nickens P, Alonso A, Djousse L, Forman DE, Gillis  
371 AM, Hendriks JML, Hills MT, Kirchhof P, Link MS, Marcus GM, Mehra R, Murray KT,  
372 Parkash R, Pina IL, Redline S, Rienstra M, Sanders P, Somers VK, Van Wagoner DR,  
373 Wang PJ, Cooper LS, Go AS. Research Priorities in the Secondary Prevention of Atrial  
374 Fibrillation: A National Heart, Lung, and Blood Institute Virtual Workshop Report. *J Am*  
375 *Heart Assoc* 2021:e021566.
- 376 4. Chalazan B, Mol D, Darbar FA, Ornelas-Loredo A, Al-Azzam B, Chen Y, Tofovic D, Sridhar  
377 A, Alzahrani Z, Ellinor P, Darbar D. Association of Rare Genetic Variants and Early-  
378 Onset Atrial Fibrillation in Ethnic Minority Individuals. *JAMA Cardiol* 2021.
- 379 5. Gudbjartsson DF, Holm H, Sulem P, Masson G, Oddsson A, Magnusson OT,  
380 Saemundsdottir J, Helgadottir HT, Helgason H, Johannsdottir H, Gretarsdottir S,  
381 Gudjonsson SA, Njolstad I, Lochen ML, Baum L, Ma RC, Sigfusson G, Kong A,  
382 Thorgeirsson G, Sverrisson JT, Thorsteinsdottir U, Stefansson K, Arnar DO. A frameshift  
383 deletion in the sarcomere gene MYL4 causes early-onset familial atrial fibrillation. *Eur*  
384 *Heart J* 2017;**38**:27-34.
- 385 6. Hodgson-Zingman DM, Karst ML, Zingman LV, Heublein DM, Darbar D, Herron KJ,  
386 Ballew JD, de Andrade M, Burnett JC, Jr., Olson TM. Atrial natriuretic peptide  
387 frameshift mutation in familial atrial fibrillation. *N Engl J Med* 2008;**359**:158-165.
- 388 7. Ellinor PT, Nam EG, Shea MA, Milan DJ, Ruskin JN, MacRae CA. Cardiac sodium channel  
389 mutation in atrial fibrillation. *Heart Rhythm* 2008;**5**:99-105.
- 390 8. Johnson JN, Tester DJ, Perry J, Salisbury BA, Reed CR, Ackerman MJ. Prevalence of  
391 early-onset atrial fibrillation in congenital long QT syndrome. *Heart Rhythm*  
392 2008;**5**:704-709.
- 393 9. Rivaud MR, Delmar M, Remme CA. Heritable arrhythmia syndromes associated with  
394 abnormal cardiac sodium channel function: ionic and non-ionic mechanisms.  
395 *Cardiovasc Res* 2020;**116**:1557-1570.



- 396 10. van Ouwerkerk AF, Bosada FM, Liu J, Zhang J, van Duijvenboden K, Chaffin M, Tucker  
397 NR, Pijnappels D, Ellinor PT, Barnett P, de Vries AAF, Christoffels VM. Identification of  
398 Functional Variant Enhancers Associated With Atrial Fibrillation. *Circ Res*  
399 2020;**127**:229-243.
- 400 11. Chen LY, Ballew JD, Herron KJ, Rodeheffer RJ, Olson TM. A common polymorphism in  
401 SCN5A is associated with lone atrial fibrillation. *Clin Pharmacol Ther* 2007;**81**:35-41.
- 402 12. Benito B, Brugada R, Perich RM, Lizotte E, Cinca J, Mont L, Berruezo A, Tolosana JM,  
403 Freixa X, Brugada P, Brugada J. A mutation in the sodium channel is responsible for  
404 the association of long QT syndrome and familial atrial fibrillation. *Heart Rhythm*  
405 2008;**5**:1434-1440.
- 406 13. Darbar D, Kannankeril PJ, Donahue BS, Kucera G, Stubblefield T, Haines JL, George AL,  
407 Jr., Roden DM. Cardiac sodium channel (SCN5A) variants associated with atrial  
408 fibrillation. *Circulation* 2008;**117**:1927-1935.
- 409 14. Alings M, Wilde A. "Brugada" syndrome: clinical data and suggested  
410 pathophysiological mechanism. *Circulation* 1999;**99**:666-673.
- 411 15. Schott J-J, Alshinawi C, Kyndt F, Probst V, Hoorntje TM, Hulsbeek M, Wilde AAM,  
412 Escande D, Mannens MMAM, Le Marec H. Cardiac conduction defects associate with  
413 mutations in SCN5A. *Nat Genet* 1999;**23**:20-21.
- 414 16. Tan HL, Bink-Boelkens MT, Bezzina CR, Viswanathan PC, Beaufort-Krol GC, van Tintelen  
415 PJ, van den Berg MP, Wilde AA, Balser JR. A sodium-channel mutation causes isolated  
416 cardiac conduction disease. *Nature* 2001;**409**:1043-1047.
- 417 17. Zumhagen S, Veldkamp MW, Stallmeyer B, Baartscheer A, Eckardt L, Paul M, Remme  
418 CA, Bhuiyan ZA, Bezzina CR, Schulze-Bahr E. A heterozygous deletion mutation in the  
419 cardiac sodium channel gene SCN5A with loss- and gain-of-function characteristics  
420 manifests as isolated conduction disease, without signs of Brugada or long QT  
421 syndrome. *PLoS One* 2013;**8**:e67963.
- 422 18. Hesse M, Kondo CS, Clark RB, Su L, Allen FL, Geary-Joo CT, Kunnathu S, Severson DL,  
423 Nygren A, Giles WR, Cross JC. Dilated cardiomyopathy is associated with reduced  
424 expression of the cardiac sodium channel Scn5a. *Cardiovasc Res* 2007;**75**:498-509.
- 425 19. Remme CA, Bezzina CR. Sodium channel (dys)function and cardiac arrhythmias.  
426 *Cardiovasc Ther* 2010;**28**:287-294.
- 427 20. Wang T, Wehrens XH. Enhanced impact of SCN5A mutation associated with long QT  
428 syndrome in fetal splice isoform. *Heart Rhythm* 2012;**9**:598-599.
- 429 21. Rivolta I, Abriel H, Tateyama M, Liu H, Memmi M, Vardas P, Napolitano C, Priori SG,  
430 Kass RS. Inherited Brugada and long QT-3 syndrome mutations of a single residue of  
431 the cardiac sodium channel confer distinct channel and clinical phenotypes. *J Biol*  
432 *Chem* 2001;**276**:30623-30630.
- 433 22. Clerx M, Heijman J, Collins P, Volders PGA. Predicting changes to INa from missense  
434 mutations in human SCN5A. *Sci Rep* 2018;**8**:12797.
- 435 23. Makiyama T, Akao M, Shizuta S, Doi T, Nishiyama K, Oka Y, Ohno S, Nishio Y, Tsuji K,  
436 Itoh H, Kimura T, Kita T, Horie M. A novel SCN5A gain-of-function mutation M1875T  
437 associated with familial atrial fibrillation. *J Am Coll Cardiol* 2008;**52**:1326-1334.
- 438 24. Skryabin BV, Kummerfeld DM, Gubar L, Seeger B, Kaiser H, Stegemann A, Roth J,  
439 Meuth SG, Pavenstädt H, Sherwood J, Pap T, Wedlich-Söldner R, Sunderkötter C,  
440 Schwartz YB, Brosius J, Rozhdestvensky TS. Pervasive head-to-tail insertions of DNA  
441 templates mask desired CRISPR-Cas9-mediated genome editing events. *Sci Adv*  
442 2020;**6**:eaax2941.

- 443 25. Smirnov A, Fishman V, Yunusova A, Korablev A, Serova I, Skryabin BV, Rozhdestvensky  
444 TS, Battulin N. DNA barcoding reveals that injected transgenes are predominantly  
445 processed by homologous recombination in mouse zygote. *Nucleic Acids Res*  
446 2020;**48**:719-735.
- 447 26. Silbernagel N, Walecki M, Schafer MK, Kessler M, Zobeiri M, Rinne S, Kiper AK,  
448 Komadowski MA, Vowinkel KS, Wemhoner K, Fortmuller L, Schewe M, Dolga AM,  
449 Scekcic-Zahirovic J, Matschke LA, Culmsee C, Baukrowitz T, Monassier L, Ullrich ND,  
450 Dupuis L, Just S, Budde T, Fabritz L, Decher N. The VAMP-associated protein VAPB is  
451 required for cardiac and neuronal pacemaker channel function. *FASEB J* 2018;**32**:6159-  
452 6173.
- 453 27. Blana A, Kaese S, Fortmüller L, Laakmann S, Damke D, van Bragt K, Eckstein J, Piccini I,  
454 Kirchhefer U, Nattel S, Breithardt G, Carmeliet P, Carmeliet E, Schotten U, Verheule S,  
455 Kirchhof P, Fabritz L. Knock-in gain-of-function sodium channel mutation prolongs  
456 atrial action potentials and alters atrial vulnerability. *Heart Rhythm* 2010;**7**:1862-1869.
- 457 28. Lemoine MD, Duverger JE, Naud P, Chartier D, Qi XY, Comtois P, Fabritz L, Kirchhof P,  
458 Nattel S. Arrhythmogenic left atrial cellular electrophysiology in a murine genetic long  
459 QT syndrome model. *Cardiovascular research* 2011;**92**:67-74.
- 460 29. Holmes AP, Yu TY, Tull S, Syeda F, Kuhlmann SM, O'Brien SM, Patel P, Brain KL, Pavlovic  
461 D, Brown NA, Fabritz L, Kirchhof P. A Regional Reduction in Ito and IKACH in the Murine  
462 Posterior Left Atrial Myocardium Is Associated with Action Potential Prolongation and  
463 Increased Ectopic Activity. *PLoS One* 2016;**11**:e0154077.
- 464 30. Syeda F, Holmes AP, Yu TY, Tull S, Kuhlmann SM, Pavlovic D, Betney D, Riley G, Kucera  
465 JP, Jousset F, de Groot JR, Rohr S, Brown NA, Fabritz L, Kirchhof P. PITX2 Modulates  
466 Atrial Membrane Potential and the Antiarrhythmic Effects of Sodium-Channel  
467 Blockers. *J Am Coll Cardiol* 2016;**68**:1881-1894.
- 468 31. Yu TY, Syeda F, Holmes AP, Osborne B, Dehghani H, Brain KL, Kirchhof P, Fabritz L. An  
469 automated system using spatial oversampling for optical mapping in murine atria.  
470 Development and validation with monophasic and transmembrane action potentials.  
471 *Prog Biophys Mol Biol* 2014;**115**:340-348.
- 472 32. O'Shea C, Holmes AP, Yu TY, Winter J, Wells SP, Correia J, Boukens BJ, De Groot JR,  
473 Chu GS, Li X, Ng GA, Kirchhof P, Fabritz L, Rajpoot K, Pavlovic D. ElectroMap: High-  
474 throughput open-source software for analysis and mapping of cardiac  
475 electrophysiology. *Sci Rep* 2019;**9**:1389.
- 476 33. Nuyens D, Stengl M, Dugarmaa S, Rossenbacker T, Compernelle V, Rudy Y, Smits JF,  
477 Flameng W, Clancy CE, Moons L, Vos MA, Dewerchin M, Benndorf K, Collen D,  
478 Carmeliet E, Carmeliet P. Abrupt rate accelerations or premature beats cause life-  
479 threatening arrhythmias in mice with long-QT3 syndrome. *Nat Med* 2001;**7**:1021-  
480 1027.
- 481 34. Remme CA, Verkerk AO, Nuyens D, van Ginneken AC, van Brunschot S, Belterman CN,  
482 Wilders R, van Roon MA, Tan HL, Wilde AA, Carmeliet P, de Bakker JM, Veldkamp MW,  
483 Bezzina CR. Overlap syndrome of cardiac sodium channel disease in mice carrying the  
484 equivalent mutation of human SCN5A-1795insD. *Circulation* 2006;**114**:2584-2594.
- 485 35. Holmes AP, Saxena P, Kabir SN, O'Shea C, Kuhlmann SM, Gupta S, Fobian D, Apicella  
486 C, O'Reilly M, Syeda F, Reyat JS, Smith GL, Workman AJ, Pavlovic D, Fabritz L, Kirchhof  
487 P. Atrial resting membrane potential confers sodium current sensitivity to  
488 propafenone, flecainide, and dronedarone. *Heart Rhythm* 2021.

- 489 36. Casini S, Albesa M, Wang Z, Portero V, Ross-Kaschitza D, Rougier JS, Marchal GA,  
490 Chung WK, Bezzina CR, Abriel H, Remme CA. Functional Consequences of the SCN5A-  
491 p.Y1977N Mutation within the PY Ubiquitylation Motif: Discrepancy between HEK293  
492 Cells and Transgenic Mice. *Int J Mol Sci* 2019;**20**.
- 493 37. Gabelli SB, Boto A, Kuhns VH, Bianchet MA, Farinelli F, Aripirala S, Yoder J, Jakoncic J,  
494 Tomaselli GF, Amzel LM. Regulation of the NaV1.5 cytoplasmic domain by calmodulin.  
495 *Nat Commun* 2014;**5**:5126.
- 496 38. Schotten U, Verheule S, Kirchhof P, Goette A. Pathophysiological mechanisms of atrial  
497 fibrillation: a translational appraisal. *Physiol Rev* 2011;**91**:265-325.
- 498 39. Nattel S, Heijman J, Zhou L, Dobrev D. Molecular Basis of Atrial Fibrillation  
499 Pathophysiology and Therapy: A Translational Perspective. *Circ Res* 2020;**127**:51-72.
- 500 40. Goette A, Kalman JM, Aguinaga L, Akar J, Cabrera JA, Chen SA, Chugh SS, Corradi D,  
501 D'Avila A, Dobrev D, Fenelon G, Gonzalez M, Hatem SN, Helm R, Hindricks G, Ho SY,  
502 Hoit B, Jalife J, Kim YH, Lip GY, Ma CS, Marcus GM, Murray K, Nogami A, Sanders P,  
503 Uribe W, Van Wagoner DR, Nattel S, Document R. EHRA/HRS/APHRS/SOLAECE expert  
504 consensus on atrial cardiomyopathies: definition, characterization, and clinical  
505 implication. *Europace* 2016;**18**:1455-1490.
- 506 41. Kirchhof PF, Fabritz CL, Franz MR. Postrepolarization refractoriness versus conduction  
507 slowing caused by class I antiarrhythmic drugs: antiarrhythmic and proarrhythmic  
508 effects. *Circulation* 1998;**97**:2567-2574.
- 509 42. Liu H, Atkins J, Kass RS. Common molecular determinants of flecainide and lidocaine  
510 block of heart Na<sup>+</sup> channels: evidence from experiments with neutral and quaternary  
511 flecainide analogues. *J Gen Physiol* 2003;**121**:199-214.
- 512 43. Ramos E, O'Leary M E. State-dependent trapping of flecainide in the cardiac sodium  
513 channel. *J Physiol* 2004;**560**:37-49.
- 514 44. Fabritz L, Damke D, Emmerich M, Kaufmann SG, Theis K, Blana A, Fortmuller L,  
515 Laakmann S, Hermann S, Aleynikhenko E, Steinfurt J, Volkery D, Riemann B, Kirchhefer  
516 U, Franz MR, Breithardt G, Carmeliet E, Schafers M, Maier SK, Carmeliet P, Kirchhof P.  
517 Autonomic modulation and antiarrhythmic therapy in a model of long QT syndrome  
518 type 3. *Cardiovasc Res* 2010;**87**:60-72.
- 519 45. Cerrone M, Remme CA, Tadros R, Bezzina CR, Delmar M. Beyond the One Gene-One  
520 Disease Paradigm: Complex Genetics and Pleiotropy in Inheritable Cardiac Disorders.  
521 *Circulation* 2019;**140**:595-610.
- 522 46. Bogeholz N, Pauls P, Kaese S, Schulte JS, Lemoine MD, Dechering DG, Frommeyer G,  
523 Goldhaber JJ, Seidl MD, Kirchhefer U, Eckardt L, Muller FU, Pott C. Triggered activity in  
524 atrial myocytes is influenced by Na<sup>(+)</sup>/Ca<sup>(2+)</sup> exchanger activity in genetically altered  
525 mice. *J Mol Cell Cardiol* 2016;**101**:106-115.
- 526 47. Voigt N, Li N, Wang Q, Wang W, Trafford AW, Abu-Taha I, Sun Q, Wieland T, Ravens U,  
527 Nattel S, Wehrens XH, Dobrev D. Enhanced sarcoplasmic reticulum Ca<sup>2+</sup> leak and  
528 increased Na<sup>+</sup>-Ca<sup>2+</sup> exchanger function underlie delayed afterdepolarizations in  
529 patients with chronic atrial fibrillation. *Circulation* 2012;**125**:2059-2070.
- 530 48. Heijman J, Muna AP, Veleva T, Molina CE, Sutanto H, Tekook M, Wang Q, Abu-Taha  
531 IH, Gorka M, Kunzel S, El-Armouche A, Reichenspurner H, Kamler M, Nikolaev V,  
532 Ravens U, Li N, Nattel S, Wehrens XHT, Dobrev D. Atrial Myocyte NLRP3/CaMKII Nexus  
533 Forms a Substrate for Postoperative Atrial Fibrillation. *Circ Res* 2020;**127**:1036-1055.
- 534 49. Molina CE, Abu-Taha IH, Wang Q, Rosello-Diez E, Kamler M, Nattel S, Ravens U,  
535 Wehrens XHT, Hove-Madsen L, Heijman J, Dobrev D. Profibrotic, Electrical, and

- 536 Calcium-Handling Remodeling of the Atria in Heart Failure Patients With and Without  
537 Atrial Fibrillation. *Front Physiol* 2018;**9**:1383.
- 538 50. Uzun AU, Mannhardt I, Breckwoldt K, Horvath A, Johannsen SS, Hansen A,  
539 Eschenhagen T, Christ T. Ca(2+)-Currents in Human Induced Pluripotent Stem Cell-  
540 Derived Cardiomyocytes Effects of Two Different Culture Conditions. *Front Pharmacol*  
541 2016;**7**:300.
- 542 51. Lemoine MD, Lemme M, Ulmer BM, Braren I, Krasemann S, Hansen A, Kirchhof P,  
543 Meyer C, Eschenhagen T, Christ T. Intermittent Optogenetic Tachypacing of Atrial  
544 Engineered Heart Tissue Induces Only Limited Electrical Remodelling. *J Cardiovasc*  
545 *Pharmacol* 2020;**77**:291-299.
